# Supplementary material
Source: publisher figshare collection journal article supplement (https://diabetesjournals.figshare.com/ndownloader/files/26133170)
Supplement: Supplementary file 1 [file 26133170]

**Supplement Material**

Supplement Table S1: Depression dimensions based on Adams et al, 2004

| GDS-item                                                                                                                            | Question                                                                   | Dimension |
|-------------------------------------------------------------------------------------------------------------------------------------|----------------------------------------------------------------------------|-----------|
| GDS1                                                                                                                                | Are you basically satisfied with your life?                                | D         |
| GDS2                                                                                                                                | Have you dropped many of your activities and interests                     | WAV       |
| GDS-3                                                                                                                               | Do you feel that your life is empty                                        | D         |
| GDS-4                                                                                                                               | Do you often get bored?                                                    | D         |
| GDS-5                                                                                                                               | Are you in good spirits most of the time?                                  | D         |
| GDS-6                                                                                                                               | Are you afraid that something bad is going to happen to you?               | A         |
| GDS-7                                                                                                                               | Are you in good spirits most of the time?                                  | D         |
| GD-8                                                                                                                                | Do you often feel helpless?                                                | H         |
| GDS-9                                                                                                                               | Do you prefer to stay at home, rather than going out and doing new things? | WAV       |
| GDS-10                                                                                                                              | Do you feel you have more problems with memory than most?                  | M         |
| GDS-11                                                                                                                              | Do you think it is wonderful to be alive now?                              | D         |
| GDS-12                                                                                                                              | Do you feel pretty worthless the way you are now?                          | H         |
| GDS-13                                                                                                                              | Do you feel full of energy?                                                | WAV       |
| GDS-14                                                                                                                              | Do you feel that your situation is hopeless                                | H         |
| GDS-15                                                                                                                              | Do you think that most people are better off than you are?                 | D         |
| GDS: Geriatric Depression Scale, D: Dysphoric Mood, WAV: Withdrawal Apathy-Vigor, A: Anxiety, H: Hopelessness, M: Memory complaint. |                                                                            |           |



Supplement Table S3: Scores of the specific neuropsychological tests per follow up

| <b>Cognitive Test</b>                                                                                                        | <b>Baseline (N=1002)</b> | <b>Follow up 1(N=837)</b> | <b>Follow up 2 (N=596)</b> |
|------------------------------------------------------------------------------------------------------------------------------|--------------------------|---------------------------|----------------------------|
| Trail making time A (seconds)                                                                                                | 55.00 (43.00- 71.00)     | 53.00 (42.00-70.00)       | 54.00 (42.00- 72.00)       |
| Trail making time B (seconds)                                                                                                | 119.50 (91.00-161.00)    | 117.00 (89.50-166.00)     | 119.00 (92.00-174.00)      |
| Digit Symbol score                                                                                                           | 34.36 (10.51)            | 34.40 (10.43)             | 33.71 (10.29)              |
| Diamond cancellation (# of correct answers)                                                                                  | 16.50 (2.70)             | 16.82 (2.47)              | 16.90 (2.33)               |
| Digit-Span Backward                                                                                                          | 5.55 (1.93)              | 5.34 (1.91)               | 5.72 (1.99)                |
| Digit-Span Forward                                                                                                           | 8.33 (1.80)              | 8.12 (1.85)               | 8.29 (1.89)                |
| ADAS- Recognition                                                                                                            | 20.99 (2.18)             | 21.32 (2.13)              | 21.19 (2.58)               |
| ADAS-Immediate Recall                                                                                                        | 17.99 (3.74)             | 17.63 (4.08)              | 17.86 (4.06)               |
| ADAS- Delayed recall                                                                                                         | 4.90 (2.16)              | 4.77 (2.27)               | 4.80 (2.31)                |
| Category (animal) fluency                                                                                                    | 35.40 (8.90)             | 35.14 (9.33)              | 35.39 (8.86)               |
| Similarities- WAIS-R                                                                                                         | 21.32 (5.99)             | 20.67 (6.06)              | 21.41(5.25)                |
| Trail making time A and B are described as Median (Interquartile Range, IQR) and the rest of variables described as Mean(SD) |                          |                           |                            |
